# Supplementary material for: Map of Enteropathogenic Escherichia coli Targets Mitochondria and Triggers DRP-1-Mediated Mitochondrial Fission and Cell Apoptosis in Bovine Mastitis
Source: MDPI journal article supplement (doi:10.3390/ijms23094907), 2022-04-28
Supplement: s1 [file s1]

Supplementary Material

**Table S1.** Major Function of Effector *Proteins*.

| Effector Proteins | Gene        | Major Function Furing EPEC Infection                                             |
|-------------------|-------------|----------------------------------------------------------------------------------|
| Tir               | <i>tir</i>  | Intimate adherence and actin pedestal formation                                  |
| EspB              | <i>espB</i> | Inhibition of myosin function, effacement of microvillus and anti-phagocytosis   |
| EspF              | <i>espF</i> | Membrane remodeling and actin nucleation                                         |
| EspG              | <i>espG</i> | Inhibition of recycling endosomes, protein secretion, and microtubule disruption |
| EspH              | <i>espH</i> | Inhibition of opsono-phagocytosis and filopodial formation                       |
| EspZ              | <i>espZ</i> | Inhibition of cell cytotoxicity                                                  |
| Map               | <i>map</i>  | Filopodia                                                                        |
